# Supplementary material for: Carboxylic acid-derived oxacalix[2]arene[2]pyrazine self-assembles into unprecedented diamondoid networks
Source: Royal Society of Chemistry journal article supplement (doi:10.1039/c2ce25315a), 2012-01-01
Supplement: c2ce25315a.pdf [file c2ce25315a.pdf]

## Carboxylic acid-derived oxacalix[2]arene[2]pyrazine self-assembles into unprecedented diamondoid networks

Xiao-Yan Li,<sup>a</sup> Ke-Ying Yu,<sup>a</sup> Xiao-Li Zhao,<sup>b</sup> Ming-Liang Ma,<sup>\*a</sup> Fang Guo,<sup>c</sup>  
Xian-Qiang Mi,<sup>c</sup> Biao Jiang<sup>\*c</sup> and Ke Wen<sup>\*ac</sup>

<sup>a</sup>Shanghai Engineering Research Center of Molecular Therapeutics and New Drug Development,  
East China Normal University, Shanghai 200062, China

E-mail: [mlma@brain.ecnu.edu.cn](mailto:mlma@brain.ecnu.edu.cn); [kwen@brain.ecnu.edu.cn](mailto:kwen@brain.ecnu.edu.cn); Fax: +8621-6260-1953; Tel:  
+8621-6223-7102

<sup>b</sup>Shanghai Key Laboratory of Green Chemistry and Chemical Processes, and Department of  
Chemistry, East China Normal University, Shanghai 200062, China

<sup>c</sup>Center for Nanomedicine, Shanghai Advanced Research Institute, Chinese Academy of Science,  
Shanghai 201203, China.

E-mail: [jiangb@sari.ac.cn](mailto:jiangb@sari.ac.cn); [wenk@sari.ac.cn](mailto:wenk@sari.ac.cn); Fax: +8621-5080-7562; Tel: +8621- 5080-8085.

### Electronic Supplementary Information

|                                                                                                          |     |
|----------------------------------------------------------------------------------------------------------|-----|
| Synthesis of <b>1</b> .....                                                                              | 2-3 |
| Fig. S1 Diamondoid network formed by <b>1</b> .....                                                      | 3   |
| Fig. S2 Schematic view of intermolecular interactions in the crystals of <b>1</b> .....                  | 4   |
| Fig. S3 Hydrophobic tubular channels in the crystal lattice of <b>1</b> obtained in<br>methanol.....     | 4   |
| Fig. S4 Molecular structure and intermolecular interactions for <b>1</b> obtained in<br>DMSO.....        | 5   |
| Fig. S5 Schematic presentation of the intermolecular interactions between pyridine<br>and <b>1</b> ..... | 5   |
| Fig. S6 <sup>1</sup> H NMR spectrum of compound <b>4</b> .....                                           | 6   |
| Fig. S7 <sup>13</sup> C NMR spectrum of compound <b>4</b> .....                                          | 6   |
| Fig. S8 <sup>1</sup> H NMR spectrum of compound <b>1</b> .....                                           | 7   |
| Fig. S9 <sup>13</sup> C NMR spectrum of compound <b>1</b> .....                                          | 7   |

**General Methods:** Commercially available chemicals were used without further purification unless stated otherwise.  $^1\text{H}$  and  $^{13}\text{C}$  NMR spectra were recorded on a Varian Mercury 500 (500 MHz) spectrometer in  $\text{CDCl}_3$  or  $\text{DMSO}-d_6$  with TMS as the reference. Crystal Structure Data Collection and Refinement. Intensity data were collected at at 173(2)K or room temperature (296K) on a diffractometer using graphite monochromated Mo  $K\alpha$  radiation ( $\lambda=0.71073\text{\AA}$ ). Data reduction included absorption corrections by the multi-scan method. The structures were solved by direct methods and refined by full-matrix least-squares using SHELXS-97 (sheldrick, 2008). All non-hydrogen atoms were refined anisotropically. Hydrogen atoms were added at their geometrically ideal positions and refined isotropically. The supplementary crystallographic data for this paper can be obtained free of charge from the Cambridge Crystallo-graphic Data Centre via [www.ccdc.cam.ac.uk/data\\_request/cif](http://www.ccdc.cam.ac.uk/data_request/cif).

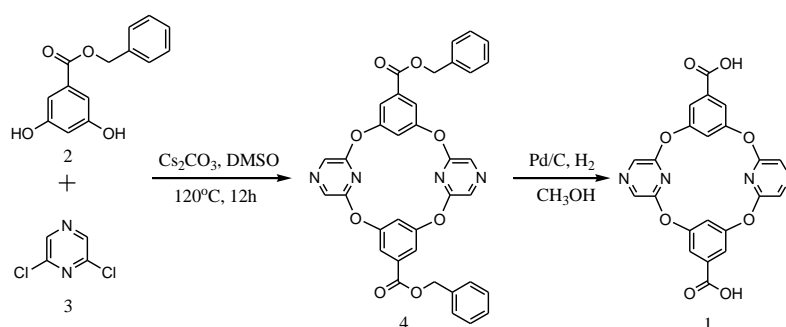

Scheme S1. Schematic representation of the synthesis of carboxylic acid functionalized oxacalix[2]arene[2]pyrazine **1**

**Synthesis of benzyl ester functionalized oxacalix[2]arene[2]pyrazine 4:** Under nitrogen atmosphere, benzyl 3,5-dihydroxybenzoate **2** (5g, 20 mmol), 2,6-dichloropyrazine **3** (3g, 20 mmol), 4 Å molecular sieves (1g) and  $\text{Cs}_2\text{CO}_3$  (13g, 40 mmol) were mixed in 50 mL dry DMSO, and the resulting solution was stirred vigorously at  $120^\circ\text{C}$  for 12h. The reaction mixture was then partitioned between EtOAc (200mL) and 0.1 M HCl (300mL), and the aqueous layer was extracted twice with EtOAc (200mL). The combined organic layer were washed with brine (300mL), dried over anhydrous  $\text{Na}_2\text{SO}_4$ . The solvent was evaporated and the crude product was purified by chromatograph on a silica gel column (petroleum ether/ethyl acetate 4:1).

Compound **4** was obtained as white powder. Yield: 5.3g (83%).  $^1\text{H}$  NMR (500 MHz,  $\text{CDCl}_3$ ):  $\delta$  8.17 (s, 4H), 7.54 (d,  $J = 2.2$ , 4H), 7.42-7.35 (m, 10H), 6.83 (t,  $J = 2.2$ , 2H), 5.31 (s, 4H);  $^{13}\text{C}$  NMR (125 MHz,  $\text{CDCl}_3$ ):  $\delta$  164.61, 157.37, 152.89, 135.39, 132.91, 128.64, 128.45, 128.38, 127.68, 120.44, 120.24, 67.29; HRMS (ESI):  $\text{C}_{36}\text{H}_{24}\text{N}_4\text{O}_8\text{Na}^+$   $m/z$  calcd 663.1486, found 663.1499.

**Synthesis of carboxylic acid functionalized oxacalix[2]arene[2]pyrazine **1**:**

Compound **4** (2 g, 3 mmol) was dissolved in methanol (200 ml) and hydrogenated in the presence of 10% palladium on charcoal (50 mg). The product **1** was obtained by filtering the palladium on charcoal as white powder. Yield: 1.3 g (90%).  $^1\text{H}$  NMR (500 MHz,  $\text{DMSO}-d_6$ ):  $\delta$  8.35 (s, 4H), 7.44 (s, 4H), 7.30 (s, 2H);  $^{13}\text{C}$  NMR (125 MHz,  $\text{DMSO}-d_6$ ):  $\delta$  165.59, 156.44, 153.74, 133.82, 129.26, 117.72, 117.43; HRMS (ESI):  $\text{C}_{22}\text{H}_{12}\text{N}_4\text{O}_8\text{Na}^+$   $m/z$  calcd 483.0547, found 483.0538.

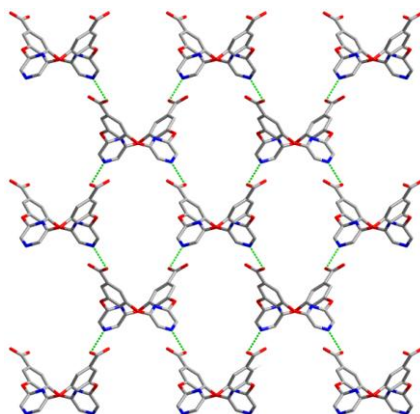

Fig. S1 Schematic presentation of the diamondoid network formed by **1**. Color code:

C (gray), O (red), N (blue).

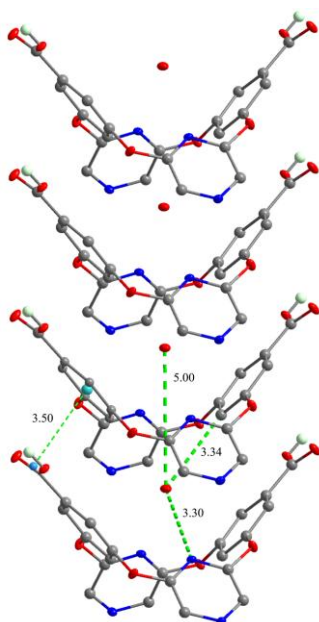

Fig. S2 Schematic view of molecular stacks of **1** in the crystal lattice, the  $\pi$ - $\pi$  stacking interactions between the carboxylic plane and the phenyl plane of the neighbouring compound **1**, water line in the core of the molecular stacks and hydrogen bond interactions between the water molecules and compound **1**. Color code: C (gray), O (red), N (blue), H (light green)

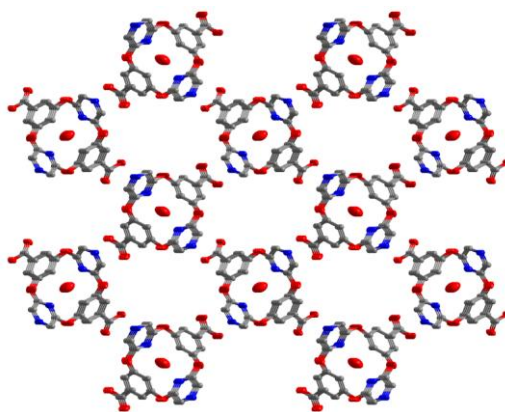

Fig. S3 The nanometer-scale hydrophobic tubular channels formed by **1** in methanol viewed along the *c*-axis, no guest molecule was filled in the channels.

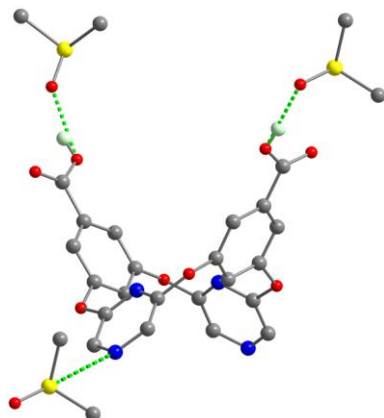

Fig. S4 Molecular structure and intermolecular interactions for **1** obtained in DMSO.

Color code: C (gray), O (red), N (blue), S (yellow), H (light green).

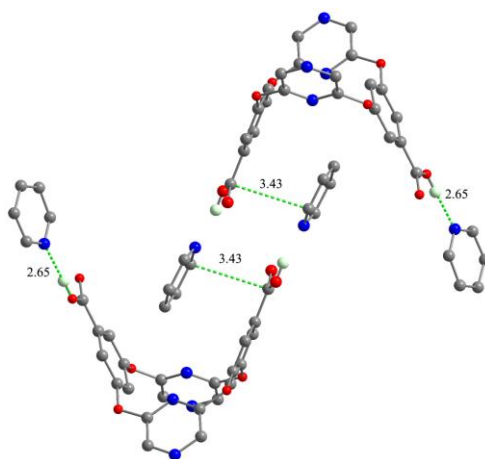

Fig. S5 Schematic presentation of the intermolecular interactions between pyridine

and **1**. Color code: C (gray), O (red), N (blue), H (light green).

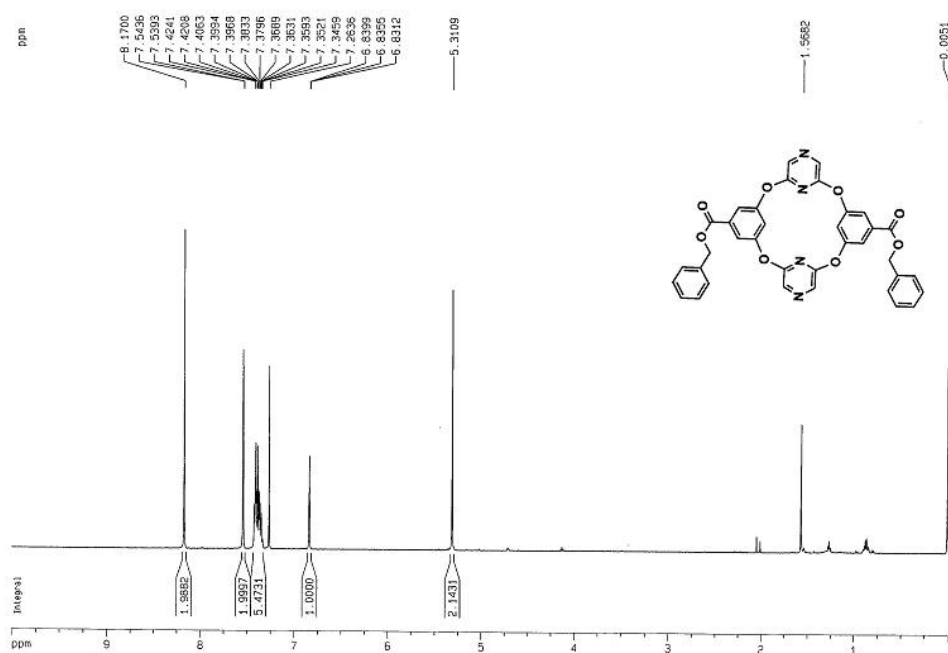

Fig.S6  $^1\text{H}$  NMR spectrum of compound **4** in  $\text{CDCl}_3$

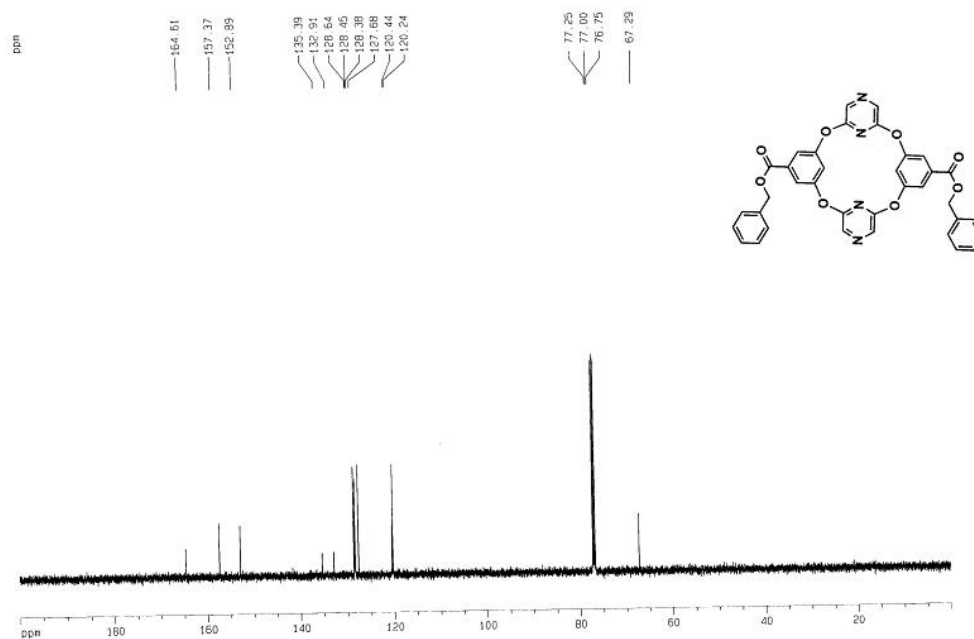

Fig.S7  $^{13}\text{C}$  NMR spectrum of compound **4** in  $\text{CDCl}_3$

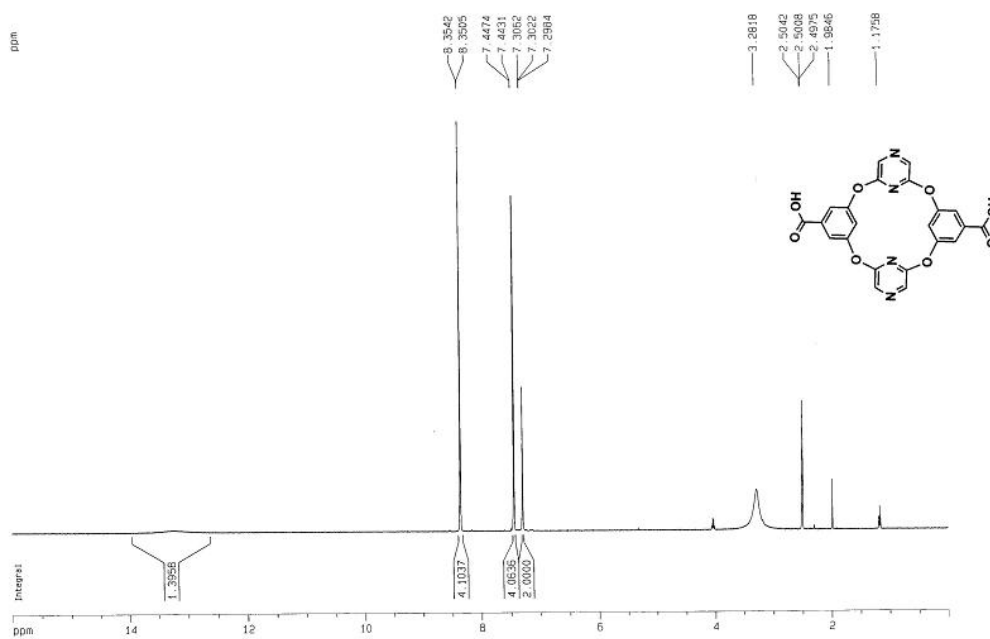

Fig.S8  $^1\text{H}$  NMR spectrum of compound 1 in  $\text{DMSO-}d_6$

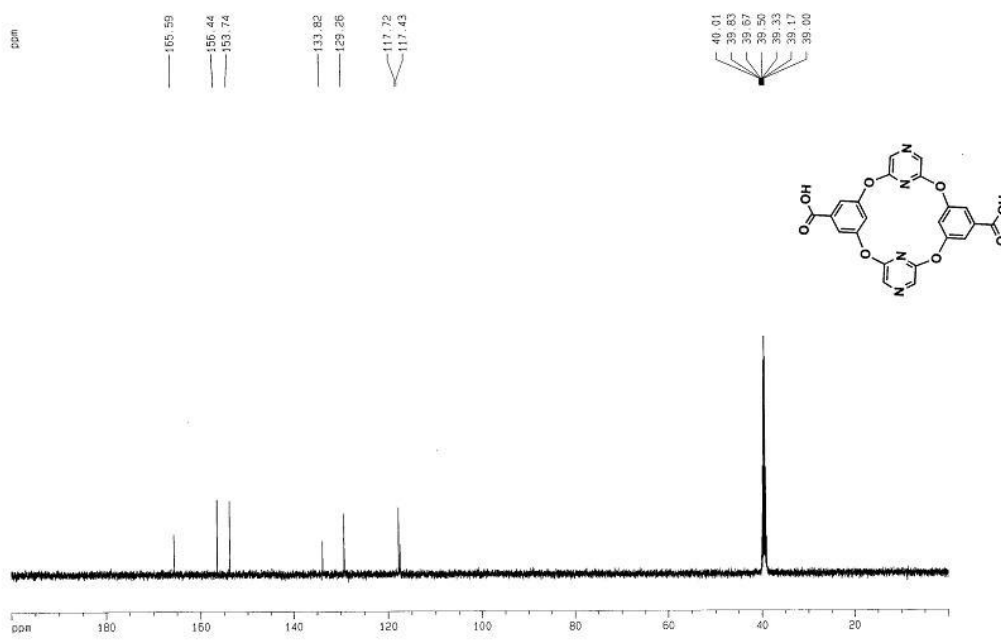

Fig.S9  $^{13}\text{C}$  NMR spectrum of compound 1 in  $\text{DMSO-}d_6$
